# Supplementary material
Source: MDPI journal article supplement (https://www.mdpi.com/1996-1073/16/4/2072)
Supplement: s1 [file s1]

## Supplementary Material

### Section S1

**Table S1.** Change in technical and economic variables derived from technological progress considering a complete integration of the VCPVIM in the year 2018 and 2040.

| Variable                          | Cost/Parameter     |              | Unit   | Reference                      |
|-----------------------------------|--------------------|--------------|--------|--------------------------------|
|                                   | 2018               | 2040         |        |                                |
| MFV efficiency                    | 18.4               | 24           | %      | [1,2]                          |
| Poy-Si total material consumption | 0.085              | 0.065        | g/μm   |                                |
| Poly-Si use per CFV               | 3.0                | 1.5          | g/W    |                                |
| CFV thickness                     | 160                | 120          | μm     |                                |
| Number of CFV per MFV             | 60                 |              | Celdas |                                |
| MFV output                        | 310                | 398          | Wp     |                                |
| Electricity                       | 0.035              | 0.024        | USD/W  |                                |
| Depreciation                      | 0.057              | 0.020        |        |                                |
| Labor                             | 0.016              | 0.013        |        |                                |
| Operation & maintenance           | 0.018              | 0.010        |        |                                |
| Total equipment yield             | 96                 | 99           | %      |                                |
|                                   |                    |              |        |                                |
| VCPVIM link                       | Total              |              |        |                                |
|                                   | manufacturing cost |              |        |                                |
|                                   | 2018               | 2040         |        |                                |
| MG-Si                             | 0.015              | 0.013        | USD/W  | Own calculation based on [1–5] |
| Poly-Si                           | 0.048              | 0.02         |        |                                |
| Ingot                             | 0.035              | 0.015        |        |                                |
| CFV                               | 0.087              | 0.06         |        |                                |
| MFV                               | 0.122              | 0.09         |        |                                |
| <b>Total</b>                      | <b>0.307</b>       | <b>0.198</b> |        |                                |

**Table S2.** Capex per link of the value chain of the PV industry for the years 2018 and 2040.

| Link    | Cost (USD/W) <sub>2018</sub> |          | Cost (USD/W) <sub>2040</sub> |          | Reference |
|---------|------------------------------|----------|------------------------------|----------|-----------|
|         | Equipment                    | Facility | Equipment                    | Facility |           |
| MFV     | 0.05                         | 0.04     | 0.009                        | 0.068    | [1,6–12]  |
| CFV     | 0.08                         | 0.06     | 0.015                        | 0.102    |           |
| Ingot   | 0.05                         | 0.02     | 0.009                        | 0.034    |           |
| Poly-Si | 0.14                         | 0.05     | 0.025                        | 0.078    |           |
| MG-Si   | 0.02                         | 0.01     | 0.004                        | 0.014    |           |

**Table S3.** Discount rate and number of periods per link to prepare the cash flow.

| PV industry upstream link | Equipment depreciation (years) | Facility depreciation (years) | Subsector       | WACC (%) |
|---------------------------|--------------------------------|-------------------------------|-----------------|----------|
| MG-Si                     | 10                             | 25                            | Basic resources | 9.94     |
| Poly-Si                   | 10                             | 25                            | Chemical        | 10.81    |
| Ingot                     | 10                             | 25                            | Technological   | 11.10    |
| CFV                       | 5                              | 25                            | Technological   | 11.10    |
| MFV                       | 5                              | 25                            | Technological   | 11.10    |

Source: [7,10,13].

## Section S2

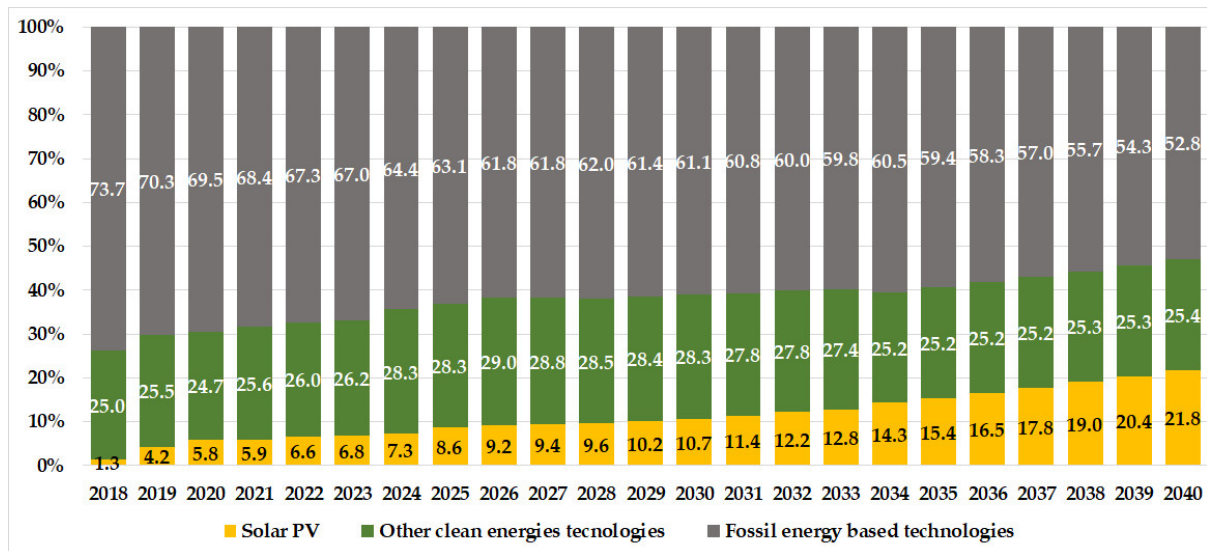

**Figure S1.** Evolution of the share of PV energy on electricity generation, 2018 - 2040. Source: Own elaboration with information from [14–17].

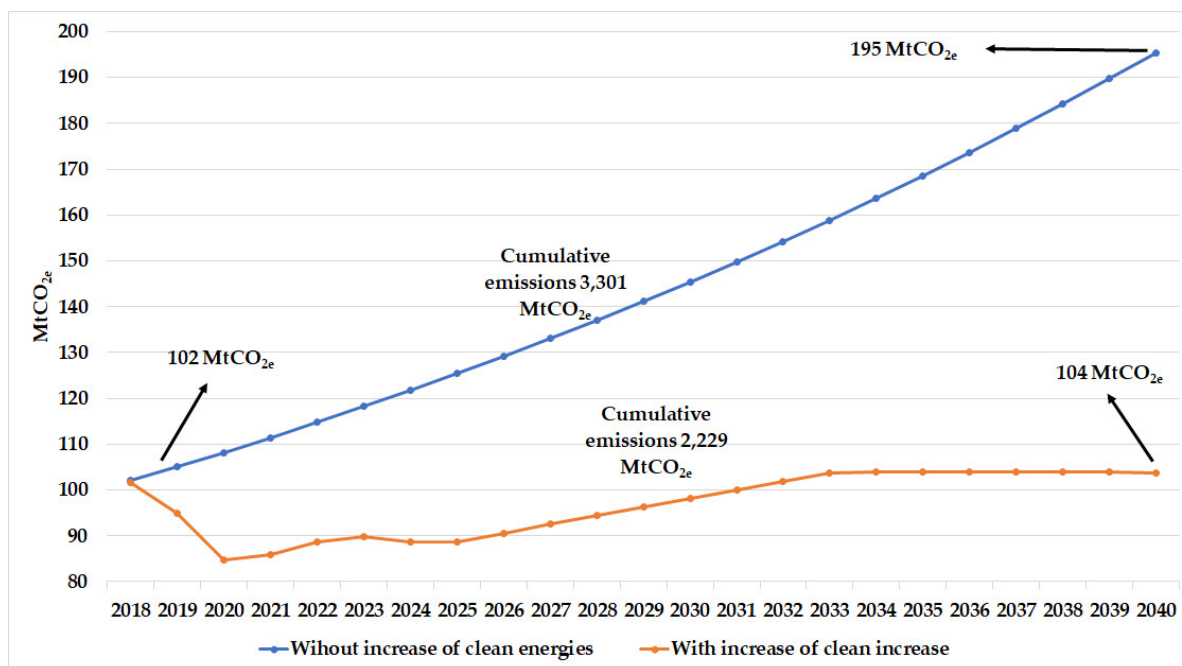

**Figure S2.** Avoided emissions evolution derived from the increase in the share of clean energies on electricity generation, 2018 – 2040. Source: Own elaboration with information from [14–17].

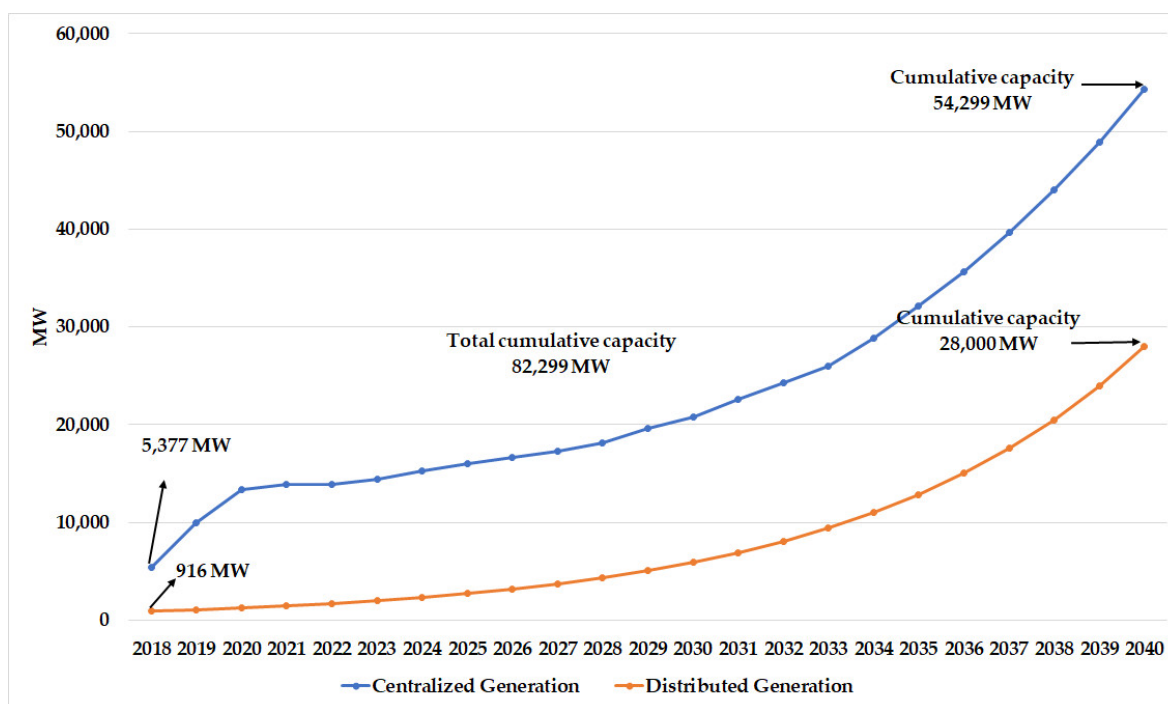

**Figure S3.** Cumulative capacity evolution of PV generation plants, 2018 – 2040. Source: Own elaboration with information from [14–17].

**Table S4.** Total socioeconomic benefits of the VCPVIM in the Base Scenario.

| Subsector                                                                          | Multiplier |             | Jobs<br>(#)   | Valor added (MUSD) |
|------------------------------------------------------------------------------------|------------|-------------|---------------|--------------------|
|                                                                                    | Jobs       | Value added |               |                    |
| Non-residential building                                                           | 0.00004    | 0.54        | 4,255         | 64.3               |
| Construction for the supply of water, oil, gas, electricity and telecommunications | 0.00003    | 0.49        | 3,229         | 57.9               |
| Division of land and urbanization construction                                     | 0.00002    | 0.47        | 2,882         | 55.6               |
| Other civil engineering constructions                                              | 0.00001    | 0.45        | 1,453         | 53.2               |
| Foundations, assembly of prefabricated structures and exterior work                | 0.00003    | 0.78        | 3,192         | 92.8               |
| Facilities and equipment in buildings                                              | 0.00007    | 0.99        | 8,588         | 118.4              |
| Finishing work in buildings                                                        | 0.00006    | 0.84        | 7,564         | 100.7              |
| Other specialized construction jobs                                                | 0.00005    | 1.22        | 5,615         | 145.5              |
| Manufacture of cardboard and paper products                                        | 0.000029   | 0.61        | 257           | 4.3                |
| Wholesale of groceries and food                                                    | 0.000351   | 6.95        | 5,004         | 88.7               |
| Retail groceries and food                                                          | 0.000115   | 2.3         | 1,641         | 29.3               |
| <b>Direct</b>                                                                      |            |             | <b>1,025</b>  | <b>355.7</b>       |
| <b>Total</b>                                                                       |            |             | <b>44,706</b> | <b>1,166.40</b>    |

**Table S5.** Manufacturing costs derived from the upstream integration of VCPVIM in the Alternative Scenario (extended version).

| Material/input<br>/parameter    | VCPVIM upstream integration evolution |                      |                      |                                 |                                 |
|---------------------------------|---------------------------------------|----------------------|----------------------|---------------------------------|---------------------------------|
|                                 | 2018                                  | 2026                 | 2031                 | 2038                            | 2040                            |
|                                 | MFV                                   | MFV+<br>CFV          | MFV+CFV+I<br>ngot    | MFV+CFV+Ingot+P<br>oly-Si+MG-Si | MFV+CFV+Ingot+P<br>oly-Si+MG-Si |
|                                 | (USD/W)                               |                      |                      |                                 |                                 |
| Depreciation                    | 0.012                                 | 0.013                | 0.013                | 0.013                           | 0.013                           |
| Maintenance                     | 0.003                                 | 0.004                | 0.004                | 0.006                           | 0.006                           |
| Labor                           | 0.004                                 | 0.004                | 0.004                | 0.008                           | 0.008                           |
| Electricity                     | 0.002                                 | 0.008                | 0.008                | 0.014                           | 0.014                           |
| SiO <sub>2</sub>                | -                                     | -                    | -                    | 0.00014                         | 0.00010                         |
| Coal                            | -                                     | -                    | -                    | 0.00044                         | 0.00035                         |
| Wood                            | -                                     | -                    | -                    | 0.00042                         | 0.00035                         |
| Coke                            | -                                     | -                    | -                    | 0.00011                         | 0.00010                         |
| Charcoal                        | -                                     | -                    | -                    | 0.00034                         | 0.00025                         |
| Natural Gas                     | -                                     | -                    | -                    | 0.00022                         | 0.00012                         |
| Electrodes <sup>1</sup>         | -                                     | -                    | -                    | 0.00189 <sup>1</sup>            | 0.00172 <sup>1</sup>            |
| Oxigen                          | -                                     | -                    | -                    | 0.00017                         | 0.00015                         |
| Lancets (graphite)              | -                                     | -                    | -                    | 0.0000004 <sup>1</sup>          | 0.00000 <sup>1</sup>            |
| Water                           | -                                     | -                    | -                    | 0.00132                         | 0.00117                         |
| MG-Si                           | -                                     | -                    | -                    | -                               | 0.00000                         |
| HCL                             | -                                     | -                    | -                    | 0.00411                         | 0.00385                         |
| Hidrogen                        | -                                     | -                    | -                    | 0.00008                         | 0.00007                         |
| Water                           | -                                     | -                    | -                    | 0.00353                         | 0.00329                         |
| Poly-Si                         | -                                     | -                    | 0.01828 <sup>1</sup> | -                               | -                               |
| Crucible                        | -                                     | -                    | 0.00395              | 0.00309                         | 0.00288                         |
| Sawing wire                     | -                                     | -                    | 0.00242 <sup>1</sup> | 0.00210                         | 0.00192                         |
| Slurry                          | -                                     | -                    | 0.00411              | 0.00257                         | 0.00237                         |
| Wafer                           | -                                     | 0.03169 <sup>1</sup> | -                    | -                               | -                               |
| Aluminum paste                  | -                                     | 0.00105              | 0.00077              | 0.00070                         | 0.00058                         |
| Silver paste                    | -                                     | 0.00192              | 0.00135              | 0.00113                         | 0.00099                         |
| Chemicals                       | -                                     | 0.02164              | 0.01827              | 0.01379                         | 0.01313                         |
| Screen printing                 | -                                     | 0.00001              | 0.00001              | 0.00001                         | 0.00001                         |
| CFV                             | 0.09400 <sup>1</sup>                  | -                    | -                    | -                               | -                               |
| Glass                           | 0.02093 <sup>1</sup>                  | 0.00937              | 0.00974              | 0.00795                         | 0.00753                         |
| Aluminum frame                  | 0.02544 <sup>1</sup>                  | 0.01238              | 0.01184              | 0.00966                         | 0.00917                         |
| Encapsulant                     | 0.01139 <sup>1</sup>                  | 0.00661              | 0.00530              | 0.00433                         | 0.00406                         |
| Junction Box & Cables           | 0.01537 <sup>1</sup>                  | 0.01000              | 0.00715              | 0.00584                         | 0.00550                         |
| Tabbling                        | 0.00880 <sup>1</sup>                  | 0.00487              | 0.00410              | 0.00334                         | 0.00311                         |
| Backsheet (EVA)                 | 0.01225 <sup>1</sup>                  | 0.00718              | 0.00570              | 0.00465                         | 0.00437                         |
| Connection ribbons              | 0.00486 <sup>1</sup>                  | 0.00224              | 0.00226              | 0.00184                         | 0.00168                         |
| Packaging                       | 0.00247                               | 0.00165              | 0.00115              | 0.00094                         | 0.00081                         |
| <b>Total manufacturing cost</b> | <b>0.217</b>                          | <b>0.140</b>         | <b>0.127</b>         | <b>0.115</b>                    | <b>0.110</b>                    |

<sup>1</sup>Imported materials and / or supplies in the development of the proposed scenarios.

Source: Own elaboration.

**Table S6.** Total socioeconomic benefits by subsector in the Alternative Scenario for the MFV link.

| <b>Subsector</b>                                                                   | <b>Jobs<br/>(#)</b> | <b>Value added<br/>(MUSD)</b> |
|------------------------------------------------------------------------------------|---------------------|-------------------------------|
| Metal ore mining                                                                   | 2,076               | 222.5                         |
| Mining related services                                                            | 1,724               | 133.5                         |
| Non-residential building                                                           | 8,335               | 126.0                         |
| Construction for the supply of water, oil, gas, electricity and telecommunications | 6,326               | 113.5                         |
| Division of land and urbanization construction                                     | 5,646               | 108.9                         |
| Other civil engineering constructions                                              | 2,846               | 104.1                         |
| Foundations, assembly of prefabricated structures and exterior work                | 6,254               | 181.8                         |
| Facilities and equipment in buildings                                              | 16,826              | 231.9                         |
| Finishing work in buildings                                                        | 14,818              | 197.2                         |
| Other specialized construction jobs                                                | 11,001              | 285.1                         |
| Manufacture of cardboard and paper products                                        | 538                 | 11.3                          |
| Manufacture of paints, coatings and adhesives                                      | 110                 | 3.4                           |
| Manufacture of plastic products                                                    | 4,747               | 86.8                          |
| Manufacture of glass and glass products                                            | 3,438               | 90.3                          |
| Basic aluminum industry                                                            | 1,534               | 80.5                          |
| Manufacture of other electrical equipment and accessories                          | 1,073               | 45.4                          |
| Wholesale of groceries and food                                                    | 10,999              | 217.6                         |
| Retail groceries and food                                                          | 3,607               | 71.9                          |
| <b>Direct</b>                                                                      | <b>2,591</b>        | <b>1,372.7</b>                |
| <b>Total</b>                                                                       | <b>104,488</b>      | <b>3,639.7</b>                |

Source: Own elaboration.

**Table S7.** Total socioeconomic benefits by subsector in the Alternative Scenario for the CFV link.

| <b>Subsector</b>                                                                   | <b>Jobs<br/>(#)</b> | <b>Value added<br/>(MUSD)</b> |
|------------------------------------------------------------------------------------|---------------------|-------------------------------|
| Metal ore mining                                                                   | 193                 | 23.4                          |
| Mining related services                                                            | 161                 | 14.0                          |
| Non-residential building                                                           | 14,641              | 221.3                         |
| Construction for the supply of water, oil, gas, electricity and telecommunications | 11,112              | 199.3                         |
| Division of land and urbanization construction                                     | 9,918               | 191.3                         |
| Other civil engineering constructions                                              | 4,999               | 182.9                         |
| Foundations, assembly of prefabricated structures and exterior work                | 10,985              | 319.3                         |
| Facilities and equipment in buildings                                              | 29,554              | 407.4                         |
| Finishing work in buildings                                                        | 26,028              | 346.4                         |
| Other specialized construction jobs                                                | 19,323              | 500.8                         |
| Manufacture of basic chemicals                                                     | 12,412              | 330.6                         |
| Manufacture of other chemicals                                                     | 3,766               | 96.2                          |
| Basic aluminum industry                                                            | 52                  | 3.3                           |
| Manufacture of other electrical equipment and accessories                          | 2,447               | 64.0                          |
| Wholesale of groceries and food                                                    | 10,131              | 158.2                         |
| Retail groceries and food                                                          | 3,322               | 52.3                          |
| <b>Direct</b>                                                                      | <b>3,627</b>        | <b>862.4</b>                  |
| <b>Total</b>                                                                       | <b>162,672</b>      | <b>3,973.0</b>                |

Source: Own elaboration.

**Table S8.** Total socioeconomic benefits by subsector in the Alternative Scenario for the Ingot link.

| <b>Subsector</b>                                                                   | <b>Jobs<br/>(#)</b> | <b>Value added<br/>(MUSD)</b> |
|------------------------------------------------------------------------------------|---------------------|-------------------------------|
| Non-residential building                                                           | 5,094               | 77.0                          |
| Construction for the supply of water, oil, gas, electricity and telecommunications | 3,867               | 69.3                          |
| Division of land and urbanization construction                                     | 3,451               | 66.6                          |
| Other civil engineering constructions                                              | 1,739               | 63.6                          |
| Foundations, assembly of prefabricated structures and exterior work                | 3,822               | 111.1                         |
| Facilities and equipment in buildings                                              | 10,283              | 141.8                         |
| Finishing work in buildings                                                        | 9,056               | 120.5                         |
| Other specialized construction jobs                                                | 6,723               | 174.2                         |
| Manufacture of other chemicals                                                     | 594                 | 14.1                          |
| Manufacture of refractory clay and mineral based products                          | 505                 | 10.1                          |
| Manufacture of other electrical equipment and accessories                          | 1,249               | 32.6                          |
| Wholesale of groceries and food                                                    | 838                 | 16.6                          |
| Retail groceries and food                                                          | 275                 | 5.5                           |
| <b>Direct</b>                                                                      | <b>3,109</b>        | <b>447.2</b>                  |
| <b>Total</b>                                                                       | <b>50,606</b>       | <b>1,350.3</b>                |

Source: Own elaboration.



**Table S9.** Total socioeconomic benefits by subsector in the Alternative Scenario for the Poly-Si link.

| <b>Subsector</b>                                                                   | <b>Jobs<br/>(#)</b> | <b>Value added<br/>(MUSD)</b> |
|------------------------------------------------------------------------------------|---------------------|-------------------------------|
| Non-residential building                                                           | 12,855              | 194.3                         |
| Construction for the supply of water, oil, gas, electricity and telecommunications | 9,757               | 175.0                         |
| Division of land and urbanization construction                                     | 8,708               | 168.0                         |
| Other civil engineering constructions                                              | 4,389               | 160.6                         |
| Foundations, assembly of prefabricated structures and exterior work                | 9,645               | 280.3                         |
| Facilities and equipment in buildings                                              | 25,948              | 357.7                         |
| Finishing work in buildings                                                        | 22,853              | 304.1                         |
| Other specialized construction jobs                                                | 16,966              | 439.7                         |
| Manufacture of other chemicals                                                     | 455                 | 10.8                          |
| Manufacture of electrical power generation and distribution equipment              | 1,761               | 42.5                          |
| Manufacture of other electrical equipment and accessories                          | 2,406               | 62.9                          |
| Wholesale of groceries and food                                                    | 528                 | 10.4                          |
| Retail groceries and food                                                          | 173                 | 3.4                           |
| <b>Direct</b>                                                                      | <b>518</b>          | <b>383.3</b>                  |
| <b>Total</b>                                                                       | <b>116,960</b>      | <b>2,593.1</b>                |

Source: Own elaboration.

**Table S10.** Total socioeconomic benefits by subsector in the Alternative Scenario for the MG-Si link.

| Subsector                                                                                             | Jobs<br>(#)   | Value added<br>(MUSD) |
|-------------------------------------------------------------------------------------------------------|---------------|-----------------------|
| Felling of trees                                                                                      | 123           | 3.7                   |
| Coal mining                                                                                           | 25            | 1.5                   |
| Non-metallic mineral mining                                                                           | 30            | 0.6                   |
| Mining related services                                                                               | 20            | 1.6                   |
| Gas supply through pipelines to the final consumer                                                    | 0             | 0.4                   |
| Non-residential building                                                                              | 2,245         | 33.9                  |
| Construction for the supply of water, oil, gas, electricity and telecommunications                    | 1,704         | 30.6                  |
| Division of land and urbanization construction                                                        | 1,521         | 29.3                  |
| Other civil engineering constructions                                                                 | 767           | 28.1                  |
| Foundations, assembly of prefabricated structures and exterior work                                   | 1,685         | 49.0                  |
| Facilities and equipment in buildings                                                                 | 4,532         | 62.5                  |
| Finishing work in buildings                                                                           | 3,992         | 53.1                  |
| Other specialized construction jobs                                                                   | 2,963         | 76.8                  |
| Manufacture of oil and coal products                                                                  | 159           | 2.8                   |
| Manufacture of basic chemicals                                                                        | 58            | 1.4                   |
| Manufacture of agricultural machinery and equipment, for construction and for the extractive industry | 37            | 1.4                   |
| Manufacture of machinery and equipment for the metalworking industry                                  | 339           | 9.6                   |
| Manufacture of electrical power generation and distribution equipment                                 | 307           | 7.4                   |
| Manufacture of other electrical equipment and accessories                                             | 420           | 11.0                  |
| Wholesale of groceries and food                                                                       | 1,064         | 21.0                  |
| Retail groceries and food                                                                             | 349           | 7.0                   |
| <b>Direct</b>                                                                                         | <b>519</b>    | <b>159.7</b>          |
| <b>Total</b>                                                                                          | <b>22,860</b> | <b>592.4</b>          |

Source: Own elaboration.

**Table S11.** Cash flow for the Baseline Scenario, 2018 - 2040.

| Year | Revenues    | Manufacturing Cost | Depreciation | Gross income | Tax        | Change in NWC | CAPEX                   | Net income | Retained earnings |
|------|-------------|--------------------|--------------|--------------|------------|---------------|-------------------------|------------|-------------------|
| 2018 | -           | -                  | -            | -            | -          | -             | -                       | -          | -                 |
| 2019 | 280,543,058 | 244,353,004        | -            | 36,190,055   | 10,857,016 | -             | -                       | 25,333,038 | 25,333,038        |
| 2020 | 266,709,480 | 232,303,957        | -            | 34,405,523   | 10,321,657 | -             | -                       | 24,083,866 | 49,416,904        |
| 2021 | 253,558,036 | 220,849,049        | -            | 32,708,987   | 9,812,696  | -             | -                       | 22,896,291 | 72,313,195        |
| 2022 | 241,055,089 | 209,958,982        | -            | 31,096,106   | 9,328,832  | -             | -                       | 21,767,275 | 94,080,469        |
| 2023 | 227,222,496 | 197,910,794        | -            | 29,311,702   | 8,793,511  | -             | -                       | 20,518,191 | 114,598,661       |
| 2024 | 212,650,717 | 185,218,775        | -            | 27,431,943   | 8,229,583  | -             | -                       | 19,202,360 | 133,801,021       |
| 2025 | 199,013,427 | 173,340,695        | -            | 25,672,732   | 7,701,820  | -             | -                       | 17,970,912 | 151,771,933       |
| 2026 | 186,250,696 | 162,224,356        | -            | 24,026,340   | 7,207,902  | -             | -                       | 16,818,438 | 168,590,371       |
| 2027 | 174,961,322 | 152,391,311        | -            | 22,570,011   | 6,771,003  | -             | -                       | 15,799,007 | 184,389,378       |
| 2028 | 173,377,922 | 151,012,170        | -            | 22,365,752   | 6,709,726  | -             | -                       | 15,656,026 | 200,045,405       |
| 2029 | 171,808,852 | 149,645,510        | -            | 22,163,342   | 6,649,003  | -             | -                       | 15,514,339 | 215,559,744       |
| 2030 | 170,253,982 | 148,291,218        | -            | 21,962,764   | 6,588,829  | 4,508,855     | 73,173,778 <sup>a</sup> | 57,799,844 | 157,759,900       |
| 2031 | 310,063,435 | 270,065,252        | 6,640,676    | 33,357,508   | 10,007,252 | 141,994       | -                       | 29,848,937 | 187,608,837       |
| 2032 | 305,660,534 | 266,230,325        | 6,640,676    | 32,789,533   | 9,836,860  | 139,977       | -                       | 29,453,372 | 217,062,209       |
| 2033 | 301,320,155 | 262,449,855        | 6,640,676    | 32,229,624   | 9,668,887  | 137,990       | -                       | 29,063,423 | 246,125,632       |
| 2034 | 297,041,409 | 258,723,067        | 6,640,676    | 31,677,666   | 9,503,300  | 19,979        | -                       | 28,835,020 | 274,960,652       |
| 2035 | 297,660,898 | 259,262,642        | 6,640,676    | 31,757,580   | 9,527,274  | 237,109       | -                       | 28,633,872 | 303,594,525       |
| 2036 | 290,308,674 | 252,858,855        | 2,664,694    | 34,785,125   | 10,435,538 | 231,253       | -                       | 26,783,029 | 330,377,553       |
| 2037 | 283,138,049 | 246,613,241        | 2,664,694    | 33,860,115   | 10,158,034 | 225,541       | -                       | 26,141,233 | 356,518,787       |
| 2038 | 276,144,540 | 240,521,894        | 2,664,694    | 32,957,952   | 9,887,386  | 219,970       | -                       | 25,515,290 | 382,034,077       |
| 2039 | 269,323,769 | 234,581,003        | 2,664,694    | 32,078,073   | 9,623,422  | 3,667,753     | 76,044,677 <sup>b</sup> | 50,925,333 | 331,108,744       |
| 2040 | 383,052,532 | 333,638,755        | 7,960,029    | 41,453,748   | 12,436,124 | 12,353,444    | -                       | 24,624,208 | 355,732,952       |

<sup>a</sup>Production capacity increase to 2.18 GW

<sup>b</sup>Production capacity increase to a 3.18 GW

Source: Own elaboration.

**Table S12.** Cash flow for the Alternative Scenario, 2018 – 2040.

| Year | Revenues    | Manufacturing Cost | Depreciation | Gross income | Tax        | Change in NWC | CAPEX          | Net income  | Retained earnings |
|------|-------------|--------------------|--------------|--------------|------------|---------------|----------------|-------------|-------------------|
| 2018 | -           | -                  | -            | -            | -          | -             | -              | -           | -                 |
| 2019 | 293,155,315 | 254,714,281        | -            | 38,441,034   | 11,532,310 | -             | -              | 26,908,724  | 26,908,724        |
| 2020 | 289,956,990 | 251,179,542        | -            | 38,777,448   | 11,633,234 | -             | -              | 27,144,214  | 54,052,937        |
| 2021 | 284,775,598 | 245,951,011        | -            | 38,824,587   | 11,647,376 | 17,804,964    | 82,678,555a    | 45,411,860  | 8,641,077         |
| 2022 | 512,649,816 | 441,429,958        | 10,089,484   | 71,219,858   | 21,365,957 | 863,926       | -              | 60,807,311  | 69,448,388        |
| 2023 | 478,870,881 | 411,106,730        | 10,089,484   | 67,764,152   | 20,329,245 | 948,293       | -              | 58,472,683  | 127,921,072       |
| 2024 | 443,984,961 | 380,013,980        | 10,089,484   | 63,970,980   | 19,191,294 | 1,014,115     | -              | 79,297,088  | 207,218,159       |
| 2025 | 408,550,573 | 348,636,053        | 33,503,286   | 59,914,519   | 17,974,356 | 13,384,947    | 235,289,678b   | 159,846,229 | 47,371,931        |
| 2026 | 358,818,192 | 305,278,406        | 33,503,286   | 53,539,786   | 16,061,936 | 6,384         | -              | 63,034,010  | 110,405,941       |
| 2027 | 352,951,857 | 299,386,533        | 25,562,544   | 53,565,324   | 16,069,597 | 1,933         | -              | 63,056,337  | 173,462,278       |
| 2028 | 347,181,430 | 293,608,373        | 25,562,544   | 53,573,058   | 16,071,917 | 2,361         | -              | 63,066,045  | 236,528,323       |
| 2029 | 341,505,345 | 287,941,731        | 25,562,544   | 53,563,614   | 16,069,084 | 6,503         | -              | 44,378,600  | 280,906,924       |
| 2030 | 335,922,058 | 282,384,456        | 6,877,568    | 53,537,602   | 16,061,281 | 19,515,745    | 324,502,969c   | 251,697,787 | 29,209,137        |
| 2031 | 482,176,981 | 404,114,000        | 35,328,861   | 78,062,981   | 23,418,894 | 82,435        | -              | 89,890,513  | 119,099,650       |
| 2032 | 476,808,712 | 398,415,993        | 35,328,861   | 78,392,719   | 23,517,816 | 77,291        | -              | 90,126,473  | 209,226,124       |
| 2033 | 471,500,209 | 392,798,327        | 35,328,861   | 78,701,882   | 23,610,565 | 72,264        | -              | 90,347,915  | 299,574,038       |
| 2034 | 466,250,809 | 387,259,871        | 35,328,861   | 78,990,938   | 23,697,281 | 67,352        | -              | 90,555,166  | 390,129,204       |
| 2035 | 461,059,852 | 381,799,507        | 35,328,861   | 79,260,345   | 23,778,104 | 62,552        | -              | 80,410,997  | 470,540,201       |
| 2036 | 455,926,688 | 376,416,133        | 24,991,308   | 79,510,555   | 23,853,166 | 57,863        | -              | 80,590,833  | 551,131,034       |
| 2037 | 450,850,674 | 371,108,666        | 24,991,308   | 79,742,008   | 23,922,602 | 32,557,247    | 1,072,777,098d | 918,158,650 | -367,027,615      |
| 2038 | 726,158,989 | 595,930,000        | 98,799,043   | 130,228,989  | 39,068,697 | 317,312       | -              | 190,276,647 | -176,750,969      |
| 2039 | 709,343,742 | 580,384,000        | 98,799,043   | 128,959,742  | 38,687,923 | 51,633        | -              | 189,122,496 | 12,371,527        |
| 2040 | 698,773,209 | 570,020,000        | 98,799,043   | 128,753,209  | 38,625,963 | -             | -              | 90,127,247  | 102,498,774       |

<sup>a</sup>Production capacity increase to 2.18 GW

<sup>b</sup>CFV link upstream integration

<sup>c</sup>Production capacity increase to 3.18 GW and Ingot link upstream integration

<sup>d</sup>Production capacity increase to 5.18 GW and Poly-Si & MG-Si links upstream integration

Source: Own elaboration.

## References

1. National Renewable Energy Laboratory (NREL) Crystalline Silicon Photovoltaic Module Manufacturing Costs and Sustainable Pricing: 1H 2018 Benchmark and Cost Reduction Roadmap; Washington, D.C., United States, 2020; p. 58;.
2. VDMA Photovoltaic Equipment International Technology Roadmap for Photovoltaic (ITRPV) - 2019 Results; VDMA: Frankfurt am Main, Germany, 2020; p. 88;.
3. Comisión Federal de Electricidad (CFE). Tarifas Eléctricas Para El Sector Industrial a Nivel Nacional. Available online: <https://app.cfe.mx/Aplicaciones/CCFE/Tarifas/TarifasCREIndustria/Industria.aspx> (accessed on 13 April 2019).
4. Sistema Nacional de Empleo (SNE). Estadísticas de Carreras Profesionales Por Área. Available online: <http://www.observatoriolaboral.gob.mx/static/estudios-publicaciones/Ingenierias.html> (accessed on 20 October 2019).
5. Instituto Nacional de Estadística y Geografía (INEGI). Banco de Información Económica. Salarios En México Por Subsector de Actividad de En La Industria Manufacturera. Available online: <https://www.inegi.org.mx/sistemas/bie/> (accessed on 12 January 2020).
6. Maycock, P.; Bradford, T. PV Technology, Performance, and Cost, 2007 Update.; 2007;
7. Powell, D.M.; Fu, R.; Horowitz, K.; Basore, P.A.; Woodhouse, M.; Buonassisi, T. The Capital Intensity of Photovoltaics Manufacturing: Barrier to Scale and Opportunity for Innovation. *Energy Environ. Sci.* **2015**, *8*, 3395–3408, doi:10.1039/c5ee01509j.
8. Goodrich, A.; Hacke, P.; Wang, Q.; Sopori, B.; Margolis, R.; James, T.L.; Woodhouse, M. A Wafer-Based Monocrystalline Silicon Photovoltaics Road Map: Utilizing Known Technology Improvement Opportunities for Further Reductions in Manufacturing Costs. *Solar Energy Materials and Solar Cells* **2013**, *114*, 110–135, doi:10.1016/j.solmat.2013.01.030.
9. National Renewable Energy Laboratory (NREL) Solar PV Manufacturing Cost Analysis: U.S. Competitiveness in a Global Industry.; NREL: Washington, D.C., United States, 2011; p. 45;.
10. Kreutzmann, A.; Schmela, M. Emancipation from Subsidy Programs; Photon International, 2008; p. 9;.
11. PCC - SE Silicon Metal Plant At Bakki in Húsavík With Production Capacity of Up To 66,000 Tons; PCC - SE: Bakkavegur Húsavík, 2013; p. 138;.
12. PCC Bakki Silicon Advanced Silicon Metal Production Plant in Iceland Available online: <https://www.pcc.is/> (accessed on 13 December 2022).
13. Damodaran Online. Data Current. Cost of Capital by Industry Sector. Available online: [https://pages.stern.nyu.edu/~adamodar/New\\_Home\\_Page/datacurrent.html](https://pages.stern.nyu.edu/~adamodar/New_Home_Page/datacurrent.html) (accessed on 14 December 2022).
14. Secretaría de Energía (SENER). Programa de Desarrollo Del Sistema Eléctrico Nacional (PRODESEN) 2019-2033. Available online: <https://www.gob.mx/sener/articulos/prodesen-2019-2033-221654> (accessed on 12 December 2022).
15. Centro Nacional de Control de Energía (CENACE) Programa de Ampliación y Modernización de La Red Nacional de Transmisión y Redes Generales de Distribución Del Mercado Eléctrico Mayorista 2019-2033; CENACE: CDMX, México, 2019; p. 576;.
16. Comisión Federal de Electricidad (CFE) Programa de Ampliación y Modernización de Las Redes Generales de Distribución 2019-2033; CFE: CDMX, México, 2019; pp. 103–103;.
17. Comisión Reguladora de Energía (CRE) Contratos Interconexión de Pequeña y Mediana Escala / Generación Distribuida Solicitudes de Interconexión de Centrales Eléctricas Con Capacidad Menor a 0.5 MW; CRE: CDMX, México, 2022; p. 8;.

[Escriba aquí]
